# Supplementary material
Source: PubMed Central journal article supplement (PMC7377387)
Supplement: NIHMS1607662-supplement-Figure_S1.pdf [file NIHMS1607662-supplement-Figure_S1.pdf]

## Supplemental Information

### Optimizing Nervous System-Specific Gene

### Targeting with Cre Driver Lines: Prevalence

### of Germline Recombination and Influencing Factors

Lin Luo, Mateusz C. Ambrozkiewicz, Fritz Benseler, Cui Chen, Emilie Dumontier, Susanne Falkner, Elisabetta Furlanis, Andrea M. Gomez, Naosuke Hoshina, Wei-Hsiang Huang, Mary Anne Hutchison, Yu Itoh-Maruo, Laura A. Lavery, Wei Li, Tomohiko Maruo, Junko Motohashi, Emily Ling-Lin Pai, Kenneth A. Pelkey, Ariane Pereira, Thomas Philips, Jennifer L. Sinclair, Jeff A. Stogsdill, Lisa Traunmüller, Jiexin Wang, Joke Wortel, Wenjia You, Nashat Abumaria, Kevin T. Beier, Nils Brose, Harold A. Burgess, Constance L. Cepko, Jean-François Cloutier, Cagla Eroglu, Sandra Goebbels, Pascal S. Kaeser, Jeremy N. Kay, Wei Lu, Liqun Luo, Kenji Mandai, Chris J. McBain, Klaus-Armin Nave, Marco A.M. Prado, Vania F. Prado, Jeffrey Rothstein, John L.R. Rubenstein, Gesine Saher, Kenji Sakimura, Joshua R. Sanes, Peter Scheiffele, Yoshimi Takai, Hisashi Umemori, Matthijs Verhage, Michisuke Yuzaki, Huda Yahya Zoghbi, Hiroshi Kawabe, and Ann Marie Craig

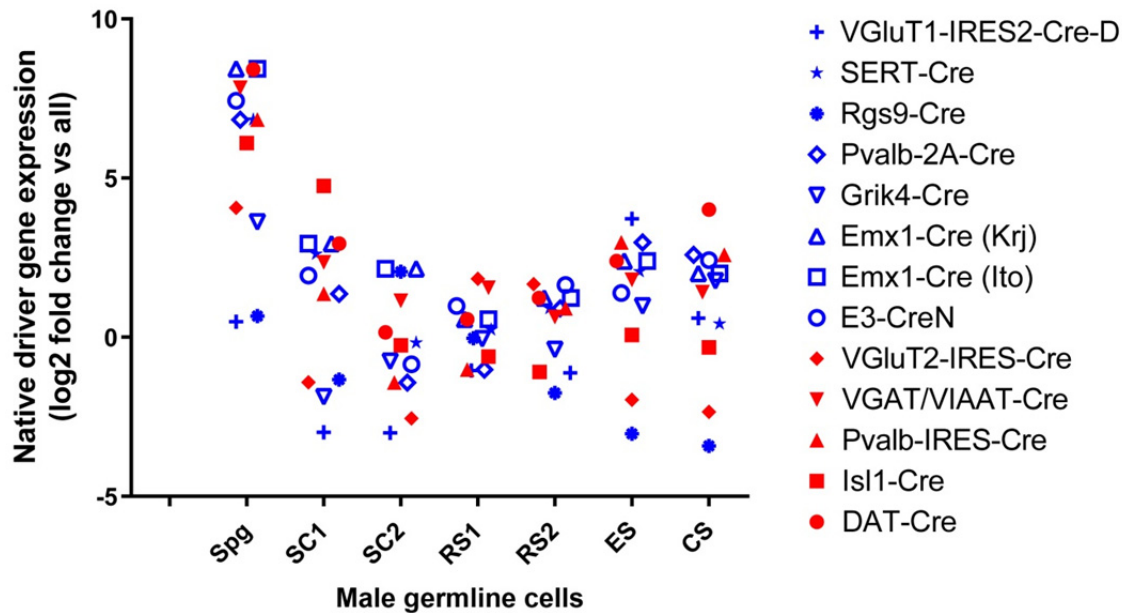

**Figure S1. Native Driver Gene Expression in Male Germline Cells, Related to Table 1**

Relative expression levels based on scRNA-seq are shown during male germline maturation for each native gene at the knock-in locus for the corresponding Cre driver line (e.g. VGlut1 transcripts for VGlut1-IRES2-Cre-D). Cre driver lines with blue symbols showed paternal germline recombination at all target loci tested; Cre driver lines with red symbols showed no paternal germline recombination at any loci tested. The germline maturation stages are: Spg, spermatogonia; SC, spermatocytes; RS, rounds spermatids; ES, elongating spermatids; CS, condensing spermatids. All knock-in Cre driver lines were included for which data was available on both paternal germline recombination and transcript level. For full names of these Cre driver lines, see Table 1. scRNA-seq data are from Lukassen et al. (2018a, 2018b).
